# Supplementary material for: Longitudinal Relationships between Bullying and Moral Disengagement among Adolescents
Source: Springer Nature journal article supplement (doi:10.1007/s10964-016-0577-0), 2016-10-04
Supplement: MOESM1 [file 10813876]

Longitudinal Relationships between Bullying and Moral Disengagement among Adolescents

Appendix A

Model fit statistics for the tests of invariance in the Bullying measure of the PRBm across three times

| Model tested | χ2 | df | Par. | C-factor | TRd | TRd (p) | CFI | ∆CFI | Pass? |
| --- | --- | --- | --- | --- | --- | --- | --- | --- | --- |
| Null model | 1927.257 | 105 |  |  |  |  |  |  |  |
| Configural | 153.656 | 72 | 63 | 3.9103 |  |  | 0.955 |  |  |
| Weak | 152.859 | 80 | 55 | 3.7871 | 7.453 | 0.489 | 0.960 | 0.005 | Yes |
| Strong | 166.984 | 88 | 47 | 4.2618 | 12.476 | 0.131 | 0.957 | 0.003 | Yes |
| Strict | 172.097 | 98 | 37 | 3.9496 | 12.003 | 0.285 | 0.959 | +0.002 | Yes |

*Note.* TRd is the Satorra-Bentler Chi square test statistics; C-factor is the correction factor due to the usage of maximum likelihood estimates with robust standard errors (MLR) in Mplus; ∆CFI is the difference of CFIs for models compared.

Appendix B

Model comparison among the AR-CL, Moral disengagement to Bullying (MD2B), and Bi-Simplex models

| Model tested1 | χ2 | df | Par. | C-factor | TRd | TRd (p) | CFI | ∆CFI | Decision |
| --- | --- | --- | --- | --- | --- | --- | --- | --- | --- |
| AR-CL | 231.220 | 124 | 65 | 3.521 |  |  | 0.958 |  |  |
| MD to Bullying | 232.341 | 127 | 62 | 3.607 | 0.328 | 0.955 | 0.959 | 0.001 | Equally well-fitted |
| Bi-Simplex | 250.959 | 130 | 59 | 3.717 | 24.089 | <0.001 | 0.952 | 0.007 | Significantly different |

*Note.* TRd is the Satorra-Bentler Chi square test statistics; C-factor is the correction factor due to the usage of the restricted maximum likelihood estimates (MLR) in Mplus; ∆CFI is the difference of CFIs for models compared.

Appendix C

Model comparison among the AR-CL, Bullying to Moral Disengagement (B2MD), and Bi-Simplex models

| Model tested | χ2 | df | Par. | C-factor | TRd | TRd (p) | CFI | ∆CFI | Decision |
| --- | --- | --- | --- | --- | --- | --- | --- | --- | --- |
| AR-CL | 231.220 | 124 | 65 | 3.5209 |  |  | 0.958 |  |  |
| Bullying to MD | 249.235 | 127 | 62 | 3.6224 | 23.427 | <0.001 | 0.952 | 0.006 | Significantly different |
| Bi-Simplex | 250.959 | 130 | 59 | 3.7173 | 1.061 | 0.786 | 0.952 | <0.001 | Equally well-fitted |

*Note.* TRd is the Satorra-Bentler Chi square test statistics; C-factor is the correction factor due to the usage of the restricted maximum likelihood estimates (MLR) in Mplus; ∆CFI is the difference of CFIs for models compared.
